# Supplementary material for: Time trends in social contacts before and during the COVID-19 pandemic: the CONNECT study
Source: bioRxiv or medRxiv preprint supplement (doi:10.1101/2021.10.06.21264632), 2022-05-05
Supplement: Supplementary file [file media-1.pdf]

## **Additional files**

|                                                                                                                                                                        |    |
|------------------------------------------------------------------------------------------------------------------------------------------------------------------------|----|
| - Figure S1. Example of the social contact diary.....                                                                                                                  | 2  |
| - Figure S2. Quebec Covid-19 epidemiology, related physical distancing measures, and CONNECT data periods.....                                                         | 3  |
| - Figure S3. Flowchart of participant identification for CONNECT 1, CONNECT 2, and CONNECT 3,4,5.....                                                                  | 4  |
| - Table S1. Overview of the different phases of CONNECT. ....                                                                                                          | 5  |
| - Table S2. Time trends in the mean number of social contacts, by location of contacts.....                                                                            | 6  |
| - Table S3. Time trends in the total number of social contacts, by key socio-demographic characteristics. ....                                                         | 7  |
| - Table S4. Time trends in the number of social contacts at school/daycare among children-students according to school level.....                                      | 10 |
| - Table S5. Time trends in social contacts at work, among workers and according to the type of employment (2016 National occupation classification).....               | 11 |
| - Table S6. Time trends in the proportion of workers who reported working remotely, according to the type of employment (2016 National occupation classification)..... | 12 |



Figure S2. Quebec Covid-19 epidemiology, related physical distancing measures, and CONNECT data periods.

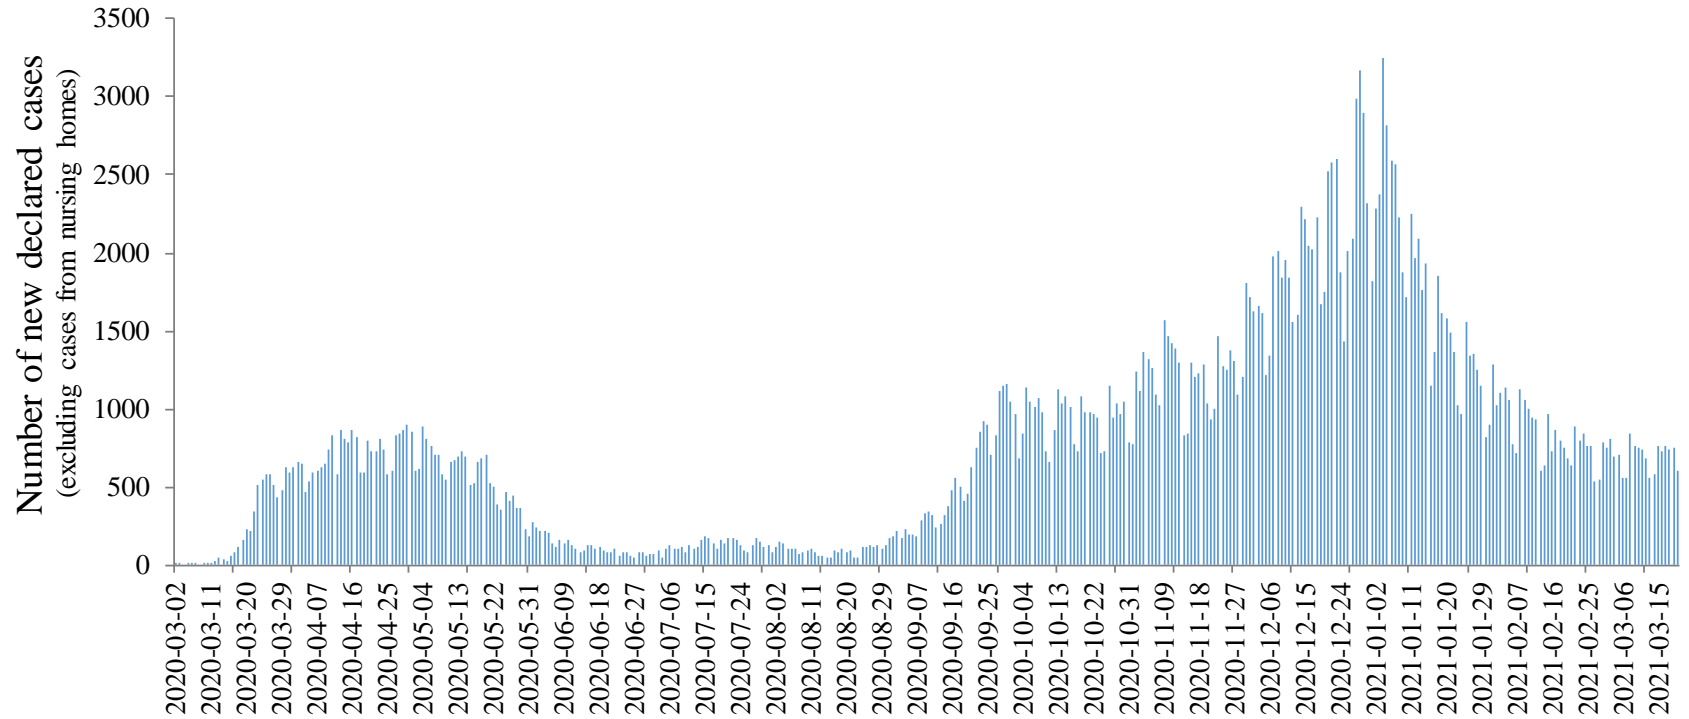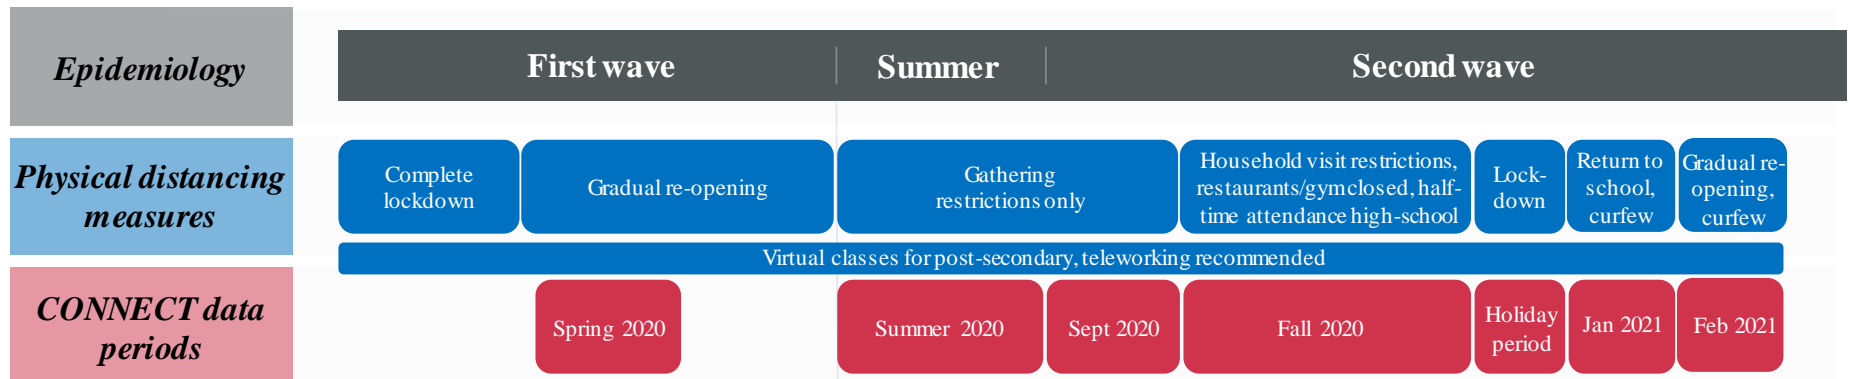

**Figure S3. Flowchart of participant identification for CONNECT 1, CONNECT 2, and CONNECT 3,4,5.**

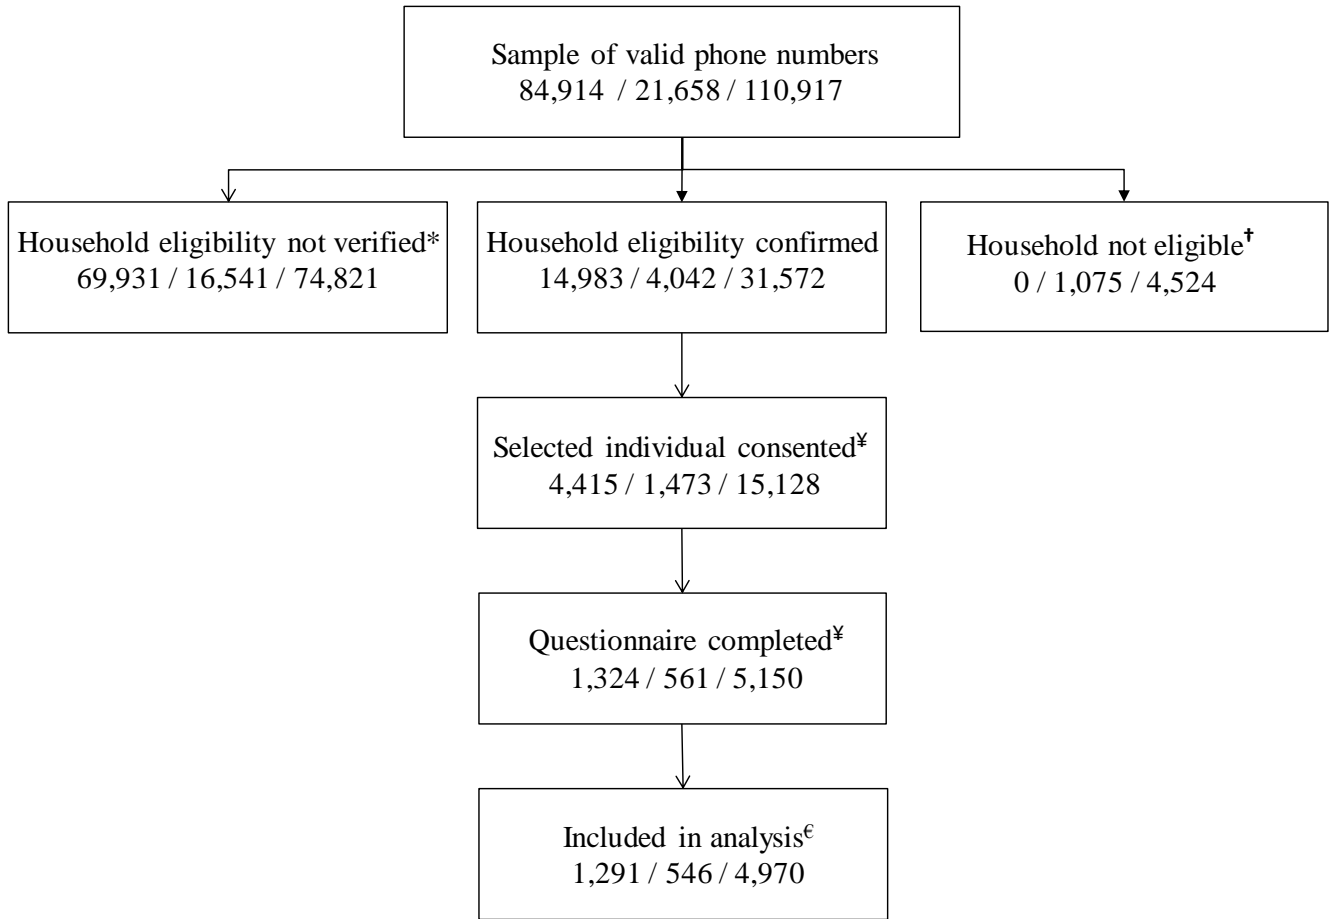

\* Household eligibility not verified: no answer, refusal to determine eligibility.

† Household not eligible: out of Quebec or Ontario for CONNECT2, out of Quebec for CONNECT3,4,5.

‡ Participation: questionnaires completed among selected individuals who consented. CONNECT 1: 1,324/4,415 = 30%, CONNECT2: 561/1,473 = 38%, CONNECT3,4,5: 5,150/15,128 = 34%.

§ Participants were excluded from the analysis when the social contact diary was not adequately completed.

**Table S1. Overview of the different phases of CONNECT.**

|                                                | <b>CONNECT1<br/>Pre-Covid</b>                             | <b>CONNECT2<br/>1<sup>st</sup> wave</b>                                 | <b>CONNECT3,4,5<br/>Summer 2020 and 2<sup>nd</sup> wave</b>   |
|------------------------------------------------|-----------------------------------------------------------|-------------------------------------------------------------------------|---------------------------------------------------------------|
| Data collection dates                          | Feb 1 <sup>st</sup> 2018 –<br>March 17 <sup>th</sup> 2019 | April 21 <sup>st</sup> 2020 –<br>May 25 <sup>th</sup> 2020              | July 3 <sup>rd</sup> 2020 –<br>February 26 <sup>th</sup> 2021 |
| Funding                                        | Canadian Immunization<br>Network (CIRN)                   | Canadian Institute of Health Research<br>(CIHR) Foundation Scheme Grant | Institut national de Santé<br>publique du Québec (INSPQ)      |
| Number of participants<br>included in analysis | <b>Quebec: 1291</b>                                       | <b>Quebec: 546</b>                                                      | <b>Quebec: 4970</b>                                           |

**Table S2. Time trends in the mean number of social contacts\*, by location of contacts.**

|                        | Pre-Covid<br>n=1291 |           | Spring 2020<br>n=546 |           | Summer 2020<br>n=988   |      | September 2020<br>n=431 |                        |      | Fall 2020<br>n=1052 |                        |      | Holidays 2020-21<br>n=1569 |                        |      | January 2021<br>n=501 |                        |      | February 2021<br>n=429 |                        |      |           |                        |
|------------------------|---------------------|-----------|----------------------|-----------|------------------------|------|-------------------------|------------------------|------|---------------------|------------------------|------|----------------------------|------------------------|------|-----------------------|------------------------|------|------------------------|------------------------|------|-----------|------------------------|
|                        | mean                | 95%CI     | mean                 | 95%CI     | Diff <sup>†</sup><br>p | mean | 95%CI                   | Diff <sup>†</sup><br>p | mean | 95%CI               | Diff <sup>†</sup><br>p | mean | 95%CI                      | Diff <sup>†</sup><br>p | mean | 95%CI                 | Diff <sup>†</sup><br>p | mean | 95%CI                  | Diff <sup>†</sup><br>p | mean | 95%CI     | Diff <sup>†</sup><br>p |
| Total                  | 7.8                 | (7.2-8.5) | 3.1                  | (2.6-3.5) | -4.8<br><.001          | 4.2  | (3.8-4.6)               | 1.2                    | 5.0  | (4.3-5.8)           | 0.8                    | 4.1  | (3.7-4.5)                  | -0.9<br>0.04           | 2.9  | (2.7-3.1)             | -1.2<br><.001          | 3.5  | (3.0-3.9)              | 0.5                    | 4.0  | (3.3-4.6) | 0.5<br>0.23            |
| Home (total)           | 2.3                 | (2.1-2.4) | 1.7                  | (1.5-1.8) | -0.6<br><.001          | 2.3  | (2.1-2.4)               | 0.6                    | 1.9  | (1.8-2.1)           | -0.3<br>0.004          | 1.7  | (1.7-1.8)                  | -0.2<br>0.04           | 1.8  | (1.7-1.8)             | 0.0<br>0.75            | 1.7  | (1.5-1.8)              | -0.1<br>0.08           | 1.7  | (1.6-1.8) | 0.0<br>0.58            |
| with household members | 1.2                 | (1.1-1.3) | 1.3                  | (1.2-1.5) | 0.1<br>0.09            | 1.3  | (1.2-1.3)               | -0.1<br>0.30           | 1.3  | (1.2-1.4)           | 0.1<br>0.44            | 1.4  | (1.3-1.5)                  | 0.1<br>0.46            | 1.4  | (1.3-1.4)             | -0.0<br>0.84           | 1.4  | (1.3-1.5)              | 0.1<br>0.24            | 1.4  | (1.2-1.5) | -0.1<br>0.40           |
| with visitors          | 1.1                 | (1.0-1.2) | 0.3                  | (0.2-0.4) | -0.8<br><.001          | 1.0  | (0.9-1.1)               | 0.7<br><.001           | 0.6  | (0.5-0.7)           | -0.4<br><.001          | 0.4  | (0.3-0.4)                  | -0.3<br><.001          | 0.4  | (0.4-0.4)             | 0.0<br>0.35            | 0.2  | (0.2-0.3)              | -0.2<br><.001          | 0.3  | (0.3-0.4) | 0.1<br>0.005           |
| Work <sup>‡</sup>      | 2.7                 | (2.1-3.2) | 1.2                  | (0.8-1.6) | -1.5<br><.001          | 1.2  | (0.8-1.5)               | -0.0<br>0.99           | 1.5  | (0.9-2.2)           | 0.4<br>0.30            | 1.1  | (0.8-1.4)                  | -0.5<br>0.18           | 0.8  | (0.6-1.1)             | -0.3<br>0.15           | 1.0  | (0.7-1.3)              | 0.2<br>0.43            | 0.9  | (0.5-1.4) | -0.1<br>0.79           |
| School <sup>†</sup>    | 1.6                 | (1.2-2.0) | 0.0                  | (0.0-0.0) | -1.6<br><.001          | 0.2  | (0.1-0.3)               | 0.2<br><.001           | 0.9  | (0.6-1.3)           | 0.7<br><.001           | 0.9  | (0.7-1.2)                  | -0.0<br>0.94           | 0.0  | (0.0-0.1)             | -0.9<br><.001          | 0.6  | (0.3-0.8)              | 0.5<br><.001           | 1.0  | (0.6-1.5) | 0.5<br>0.08            |
| Transport              | 0.0                 | (0.0-0.1) | 0.0                  | (0.0-0.0) | -0.0<br><.001          | 0.0  | (0.0-0.0)               | 0.0<br>0.13            | 0.1  | (0.0-0.1)           | 0.1<br>0.03            | 0.0  | (0.0-0.0)                  | -0.0<br>0.11           | 0.0  | (0.0-0.0)             | -0.0<br>0.003          | 0.0  | (0.0-0.0)              | 0.0<br>0.19            | 0.0  | (0.0-0.0) | -0.0<br>0.62           |
| Leisure                | 0.5                 | (0.4-0.6) | 0.0                  | (0.0-0.1) | -0.5<br><.001          | 0.2  | (0.2-0.3)               | 0.2<br><.001           | 0.2  | (0.1-0.3)           | -0.0<br>0.28           | 0.1  | (0.0-0.1)                  | -0.1<br><.001          | 0.1  | (0.1-0.1)             | 0.0<br>0.03            | 0.1  | (0.1-0.1)              | -0.0<br>0.66           | 0.1  | (0.0-0.1) | -0.0<br>0.76           |
| Other                  | 0.7                 | (0.6-0.8) | 0.2                  | (0.1-0.2) | -0.6<br><.001          | 0.3  | (0.3-0.4)               | 0.2<br><.001           | 0.3  | (0.2-0.4)           | -0.0<br>0.35           | 0.2  | (0.2-0.3)                  | -0.0<br>0.36           | 0.1  | (0.1-0.2)             | -0.1<br><.001          | 0.1  | (0.1-0.2)              | 0.0<br>0.90            | 0.2  | (0.1-0.3) | 0.0<br>0.30            |

**Pre-Covid:** February 1<sup>st</sup> 2018 to March 17<sup>th</sup> 2019; **Spring 2020:** April 21<sup>st</sup> to May 25<sup>th</sup> 2020; **Summer 2020:** July 3<sup>rd</sup> to August 31<sup>st</sup> 2020; **Fall 2020:** October 1<sup>st</sup> to December 16<sup>th</sup> 2020;

**Holidays 2020-2021:** December 17<sup>th</sup> 2020 to January 8<sup>th</sup> 2021. **1<sup>st</sup> wave:** Spring 2020; **2<sup>nd</sup> wave:** September 2020 to February 2021.

\*Mean number of social contacts weighted to represent daily contacts over one usual week, estimated at the population level.

† Diff: Absolute difference with the preceding period and p-value of this difference.

‡ Work: Contacts at work are truncated to a maximum of 40 contacts per day.

† School: Contacts at school include contacts of workers in schools (truncated to a maximum of 40 per day).

**Table S3. Time trends in the total number of social contacts, by key socio-demographic characteristics.**

|                             | Pre-Covid<br>n=1291 |            |        | Spring 2020<br>n=546 |           |                   | Summer 2020<br>n=988 |           |                   | September 2020<br>n=431 |            |                   | Fall 2020<br>n=1052 |           |                   | Holidays 2020-21<br>n=1569 |           |                   | January 2021<br>n=501 |           |                   | February 2021<br>n=429 |           |                   |
|-----------------------------|---------------------|------------|--------|----------------------|-----------|-------------------|----------------------|-----------|-------------------|-------------------------|------------|-------------------|---------------------|-----------|-------------------|----------------------------|-----------|-------------------|-----------------------|-----------|-------------------|------------------------|-----------|-------------------|
|                             | mean                | 95% CI     |        | mean                 | 95% CI    | Diff <sup>†</sup> | mean                 | 95% CI    | Diff <sup>†</sup> | mean                    | 95% CI     | Diff <sup>†</sup> | mean                | 95% CI    | Diff <sup>†</sup> | mean                       | 95% CI    | Diff <sup>†</sup> | mean                  | 95% CI    | Diff <sup>†</sup> | mean                   | 95% CI    | Diff <sup>†</sup> |
| Total                       | 7.8                 | (7.2-8.5)  |        | 3.1                  | (2.6-3.5) | -4.8<br><.001     | 4.2                  | (3.8-4.6) | 1.2<br><.001      | 5.0                     | (4.3-5.8)  | 0.8<br>0.07       | 4.1                 | (3.7-4.5) | -0.9<br>0.04      | 2.9                        | (2.7-3.1) | -1.2<br><.001     | 3.5                   | (3.0-3.9) | 0.5<br>0.02       | 4.0                    | (3.3-4.6) | 0.5<br>0.2        |
| <b>Age</b>                  |                     |            |        |                      |           |                   |                      |           |                   |                         |            |                   |                     |           |                   |                            |           |                   |                       |           |                   |                        |           |                   |
| 0-17 yrs old                | 7.7                 | (7.0-8.4)  |        | 3.9                  | (3.3-4.5) | -3.8<br><.001     | 5.2                  | (4.5-5.8) | 1.3<br>0.005      | 8.6                     | (6.9-10.4) | 3.4<br><.001      | 6.5                 | (5.7-7.3) | -2.1<br>0.03      | 3.6                        | (3.4-3.8) | -2.9<br><.001     | 4.9                   | (4.3-5.5) | 1.3<br><.001      | 7.3                    | (5.7-8.9) | 2.4<br>0.007      |
| 18-65 yrs old               | 9.0                 | (8.0-10.0) |        | 3.3                  | (2.6-3.9) | -5.7<br><.001     | 4.4                  | (3.8-4.9) | 1.1<br>0.02       | 4.8                     | (3.8-5.8)  | 0.5<br>0.43       | 4.1                 | (3.6-4.5) | -0.8<br>0.18      | 3.1                        | (2.7-3.4) | -1.0<br>0.001     | 3.6                   | (3.0-4.2) | 0.5<br>0.12       | 3.3                    | (2.5-4.2) | -0.3<br>0.62      |
| ≥ 65 yrs old                | 3.5                 | (3.0-4.0)  |        | 1.2                  | (0.7-1.6) | -2.4<br><.001     | 2.8                  | (2.0-3.6) | 1.6<br><.001      | 1.6                     | (1.2-2.0)  | -1.1<br>0.02      | 1.4                 | (1.1-1.6) | -0.3<br>0.29      | 1.2                        | (1.0-1.5) | -0.1<br>0.48      | 1.4                   | (0.8-1.9) | 0.1<br>0.67       | 1.6                    | (1.2-2.0) | 0.3<br>0.44       |
| <i>p-value</i> <sup>‡</sup> | <0.001              |            | <0.001 |                      | <0.001    |                   | <0.001               |           | <0.001            |                         | <0.001     |                   | <0.001              |           | <0.001            |                            | <0.001    |                   | <0.001                |           | <0.001            |                        | <0.001    |                   |
| <b>Sex</b>                  |                     |            |        |                      |           |                   |                      |           |                   |                         |            |                   |                     |           |                   |                            |           |                   |                       |           |                   |                        |           |                   |
| Male                        | 7.4                 | (6.4-8.3)  |        | 2.9                  | (2.5-3.3) | -4.4<br><.001     | 3.9                  | (3.3-4.4) | 1.0<br>0.005      | 4.5                     | (3.8-5.2)  | 0.6<br>0.18       | 3.9                 | (3.4-4.4) | -0.6<br>0.18      | 3.2                        | (2.9-3.5) | -0.7<br>0.02      | 3.6                   | (3.1-4.1) | 0.4<br>0.12       | 3.7                    | (3.0-4.4) | 0.1<br>0.74       |
| Female                      | 8.1                 | (7.3-8.8)  |        | 3.5                  | (2.9-4.0) | -4.6<br><.001     | 4.8                  | (4.2-5.3) | 1.3<br>0.001      | 6.2                     | (4.5-7.8)  | 1.4<br>0.12       | 4.1                 | (3.7-4.5) | -2.1<br>0.02      | 3.0                        | (2.7-3.2) | -1.1<br><.001     | 3.6                   | (3.0-4.2) | 0.6<br>0.06       | 3.6                    | (2.9-4.3) | 0.0<br>0.92       |
| <i>p-value</i> <sup>‡</sup> | 0.26                |            | 0.12   |                      | 0.02      |                   | 0.06                 |           | 0.53              |                         | 0.21       |                   | 0.99                |           | 0.85              |                            |           |                   |                       |           |                   |                        |           |                   |
| <b>Region</b>               |                     |            |        |                      |           |                   |                      |           |                   |                         |            |                   |                     |           |                   |                            |           |                   |                       |           |                   |                        |           |                   |
| Urban                       | 7.5                 | (6.9-8.1)  |        | 3.2                  | (2.8-3.6) | -4.4<br><.001     | 4.4                  | (3.9-4.8) | 1.2<br><.001      | 5.1                     | (4.3-5.8)  | 0.7<br>0.12       | 4.0                 | (3.6-4.4) | -1.1<br>0.01      | 3.1                        | (2.8-3.3) | -0.9<br><.001     | 3.5                   | (3.1-3.8) | 0.4<br>0.08       | 3.7                    | (3.1-4.2) | 0.2<br>0.55       |
| Rural                       | 8.8                 | (6.9-10.8) |        | 3.5                  | (2.6-4.4) | -5.4<br><.001     | 4.9                  | (3.7-6.1) | 1.4<br>0.06       | 3.8                     | (2.3-5.3)  | -1.1<br>0.26      | 4.2                 | (3.3-5.0) | 0.4<br>0.67       | 3.2                        | (2.9-3.5) | -1.0<br>0.03      | 4.0                   | (3.1-5.0) | 0.8<br>0.10       | 3.9                    | (2.6-5.3) | -0.1<br>0.92      |
| <i>p-value</i> <sup>‡</sup> | 0.19                |            | 0.51   |                      | 0.42      |                   | 0.14                 |           | 0.74              |                         | 0.60       |                   | 0.28                |           | 0.70              |                            |           |                   |                       |           |                   |                        |           |                   |
| <b>Region</b>               |                     |            |        |                      |           |                   |                      |           |                   |                         |            |                   |                     |           |                   |                            |           |                   |                       |           |                   |                        |           |                   |
| Greater Mtl <sup>‡</sup>    | 8.0                 | (7.0-8.9)  |        | 2.9                  | (2.4-3.5) | -5.0<br><.001     | 3.9                  | (3.5-4.3) | 0.9<br>0.006      | 4.8                     | (3.9-5.6)  | 0.9<br>0.06       | 3.9                 | (3.4-4.3) | -0.9<br>0.07      | 2.9                        | (2.5-3.3) | -0.9<br>0.001     | 3.4                   | (2.7-4.0) | 0.5<br>0.21       | 3.8                    | (2.9-4.7) | 0.4<br>0.49       |
| Other regions               | 7.1                 | (6.3-8.0)  |        | 3.2                  | (2.3-4.1) | -4.0<br><.001     | 4.5                  | (3.6-5.4) | 1.4<br>0.03       | 5.0                     | (3.5-6.4)  | 0.4<br>0.63       | 4.4                 | (3.6-5.2) | -0.5<br>0.52      | 2.7                        | (2.5-3.0) | -1.7<br><.001     | 3.4                   | (2.8-3.9) | 0.6<br>0.05       | 3.8                    | (2.9-4.6) | 0.4<br>0.43       |
| <i>p-value</i> <sup>‡</sup> | 0.19                |            | 0.67   |                      | 0.17      |                   | 0.85                 |           | 0.26              |                         | 0.46       |                   | 0.96                |           | 0.99              |                            |           |                   |                       |           |                   |                        |           |                   |
| <b>Material deprivation</b> |                     |            |        |                      |           |                   |                      |           |                   |                         |            |                   |                     |           |                   |                            |           |                   |                       |           |                   |                        |           |                   |
| Q1-Most privileged          | 7.3                 | (6.3-8.2)  |        | 2.8                  | (2.3-3.2) | -4.5<br><.001     | 4.9                  | (4.1-5.6) | 2.1<br><.001      | 5.2                     | (3.9-6.6)  | 0.4<br>0.62       | 3.6                 | (3.1-4.1) | -1.7<br>0.02      | 3.0                        | (2.7-3.3) | -0.6<br>0.02      | 3.2                   | (2.4-3.9) | 0.2<br>0.60       | 3.2                    | (2.7-3.8) | 0.0<br>0.92       |
| Q2                          | 7.2                 | (6.0-8.4)  |        | 2.9                  | (2.0-3.8) | -4.3<br><.001     | 4.1                  | (3.4-4.7) | 1.2<br>0.04       | 3.9                     | (3.1-4.8)  | -0.1<br>0.85      | 4.0                 | (3.3-4.6) | 0.0<br>0.99       | 3.5                        | (2.8-4.2) | -0.5<br>0.36      | 3.6                   | (2.8-4.3) | 0.1<br>0.90       | 3.8                    | (2.9-4.6) | 0.2<br>0.69       |
| Q3                          | 8.1                 | (6.6-9.7)  |        | 3.4                  | (2.5-4.2) | -4.8<br><.001     | 4.1                  | (3.3-5.0) | 0.8<br>0.20       | 6.6                     | (4.1-9.1)  | 2.5<br>0.07       | 4.4                 | (3.5-5.3) | -2.2<br>0.10      | 3.2                        | (2.8-3.7) | -1.2<br>0.03      | 3.3                   | (2.8-3.9) | 0.1<br>0.79       | 3.6                    | (2.4-4.8) | 0.3<br>0.68       |
| Q4                          | 7.7                 | (6.4-9.0)  |        | 3.9                  | (2.8-5.0) | -3.8<br><.001     | 4.1                  | (3.2-4.9) | 0.2<br>0.79       | 5.0                     | (3.7-6.4)  | 1.0<br>0.22       | 4.3                 | (3.5-5.2) | -0.7<br>0.37      | 2.9                        | (2.6-3.1) | -1.5<br><.001     | 4.2                   | (3.3-5.1) | 1.4<br>0.003      | 4.1                    | (2.8-5.5) | -0.1<br>0.93      |
| Q5-Most deprived            | 8.5                 | (6.5-10.4) |        | 3.3                  | (2.4-4.1) | -5.2<br><.001     | 4.5                  | (3.3-5.6) | 1.2<br>0.11       | 3.3                     | (1.7-5.0)  | -1.1<br>0.27      | 4.1                 | (2.9-5.2) | 0.8<br>0.45       | 3.0                        | (2.6-3.4) | -1.1<br>0.08      | 3.4                   | (2.3-4.4) | 0.4<br>0.51       | 4.1                    | (1.9-6.4) | 0.7<br>0.56       |
| <i>p-value</i> <sup>‡</sup> | 0.72                |            | 0.26   |                      | 0.59      |                   | 0.09                 |           | 0.40              |                         | 0.41       |                   | 0.44                |           | 0.64              |                            |           |                   |                       |           |                   |                        |           |                   |

|                                | Pre-Covid<br>n=1291 |            | Spring 2020<br>n=546 |           |                   | Summer 2020<br>n=988 |            |                   | September 2020<br>n=431 |            |                   | Fall 2020<br>n=1052 |            |                   | Holidays 2020-21<br>n=1569 |           |                   | January 2021<br>n=501 |           |                   | February 2021<br>n=429 |            |                   |
|--------------------------------|---------------------|------------|----------------------|-----------|-------------------|----------------------|------------|-------------------|-------------------------|------------|-------------------|---------------------|------------|-------------------|----------------------------|-----------|-------------------|-----------------------|-----------|-------------------|------------------------|------------|-------------------|
|                                | mean                | 95% CI     | mean                 | 95% CI    | Diff†<br><i>p</i> | mean                 | 95% CI     | Diff†<br><i>p</i> | mean                    | 95% CI     | Diff†<br><i>p</i> | mean                | 95% CI     | Diff†<br><i>p</i> | mean                       | 95% CI    | Diff†<br><i>p</i> | mean                  | 95% CI    | Diff†<br><i>p</i> | mean                   | 95% CI     | Diff†<br><i>p</i> |
| Social deprivation             |                     |            |                      |           |                   |                      |            |                   |                         |            |                   |                     |            |                   |                            |           |                   |                       |           |                   |                        |            |                   |
| Q1-Most privileged             | 7.7                 | (6.1-9.3)  | 3.7                  | (2.5-4.8) | -4.1<br><.001     | 4.7                  | (3.7-5.8)  | 1.1<br>0.18       | 6.0                     | (3.8-8.3)  | 1.3<br>0.31       | 3.8                 | (3.2-4.4)  | -2.3<br>0.06      | 3.3                        | (2.8-3.9) | -0.4<br>0.28      | 4.2                   | (3.1-5.4) | 0.9<br>0.17       | 4.4                    | (2.9-5.9)  | 0.1<br>0.90       |
| Q2                             | 8.4                 | (6.8-9.9)  | 3.3                  | (2.3-4.3) | -5.1<br><.001     | 4.3                  | (3.6-5.0)  | 1.0<br>0.11       | 4.0                     | (3.1-4.9)  | -0.2<br>0.67      | 4.1                 | (3.4-4.7)  | 0.1<br>0.91       | 3.2                        | (2.8-3.7) | -0.8<br>0.04      | 3.9                   | (2.9-5.0) | 0.7<br>0.22       | 3.2                    | (2.5-3.9)  | -0.8<br>0.23      |
| Q3                             | 7.4                 | (6.2-8.6)  | 3.0                  | (2.3-3.8) | -4.4<br><.001     | 4.1                  | (3.5-4.8)  | 1.1<br>0.03       | 5.2                     | (3.7-6.7)  | 1.1<br>0.19       | 4.4                 | (3.5-5.3)  | -0.8<br>0.34      | 3.4                        | (2.8-3.9) | -1.0<br>0.06      | 3.6                   | (2.9-4.3) | 0.2<br>0.60       | 4.1                    | (2.6-5.6)  | 0.5<br>0.58       |
| Q4                             | 6.9                 | (5.7-8.1)  | 3.4                  | (2.4-4.3) | -3.5<br><.001     | 4.2                  | (3.7-4.7)  | 0.9<br>0.11       | 5.5                     | (3.8-7.2)  | 1.3<br>0.17       | 4.4                 | (3.5-5.3)  | -1.1<br>0.28      | 3.0                        | (2.6-3.4) | -1.4<br>0.004     | 3.1                   | (2.7-3.6) | 0.1<br>0.62       | 3.6                    | (2.9-4.4)  | 0.5<br>0.26       |
| Q5-Most deprived               | 8.1                 | (6.8-9.4)  | 2.9                  | (2.3-3.5) | -5.2<br><.001     | 4.6                  | (3.4-5.9)  | 1.7<br>0.02       | 4.1                     | (3.0-5.3)  | -0.5<br>0.55      | 3.6                 | (2.9-4.2)  | -0.6<br>0.38      | 2.7                        | (2.4-3.1) | -0.8<br>0.02      | 3.2                   | (2.5-3.9) | 0.5<br>0.20       | 3.5                    | (2.4-4.6)  | 0.3<br>0.63       |
| <i>p-value</i> ‡               | 0.54                |            | 0.80                 |           |                   | 0.85                 |            |                   | 0.25                    |            |                   | 0.42                |            |                   | 0.16                       |           |                   | 0.29                  |           |                   | 0.58                   |            |                   |
| Level of education*            |                     |            |                      |           |                   |                      |            |                   |                         |            |                   |                     |            |                   |                            |           |                   |                       |           |                   |                        |            |                   |
| No diploma                     | 6.0                 | (3.2-8.8)  | 4.1                  | (0.7-7.5) | -1.9<br>0.41      | 7.2                  | (0.0-15.4) | 3.1<br>0.49       | 3.3                     | (0.0-7.1)  | -3.9<br>0.34      | 6.8                 | (1.6-12.0) | 3.5<br>0.28       | 3.4                        | (0.9-6.0) | -3.4<br>0.26      | 2.2                   | (1.7-2.8) | -1.2<br>0.37      | 1.5                    | (0.9-2.2)  | -0.7<br>0.11      |
| High school                    | 8.8                 | (5.6-12.0) | 5.5                  | (2.8-8.3) | -3.2<br>0.13      | 3.6                  | (2.1-5.1)  | -2.0<br>0.22      | 5.9                     | (1.8-10.1) | 2.4<br>0.28       | 4.2                 | (2.4-5.9)  | -1.8<br>0.44      | 2.5                        | (1.8-3.2) | -1.6<br>0.09      | 4.2                   | (2.2-6.2) | 1.7<br>0.12       | 4.5                    | (1.1-8.0)  | 0.3<br>0.87       |
| College, cegep, non-university | 8.4                 | (6.7-10.0) | 3.3                  | (2.1-4.4) | -5.1<br><.001     | 4.2                  | (3.0-5.3)  | 0.9<br>0.27       | 5.7                     | (3.0-8.4)  | 1.6<br>0.29       | 4.3                 | (3.3-5.4)  | -1.4<br>0.33      | 3.2                        | (2.6-3.8) | -1.1<br>0.07      | 4.4                   | (3.0-5.8) | 1.2<br>0.11       | 3.0                    | (1.9-4.2)  | -1.4<br>0.14      |
| University                     | 10.7                | (9.0-12.5) | 2.5                  | (1.7-3.3) | -8.2<br><.001     | 4.0                  | (3.4-4.6)  | 1.5<br>0.003      | 4.4                     | (2.9-5.8)  | 0.4<br>0.62       | 4.0                 | (3.3-4.8)  | -0.4<br>0.66      | 3.1                        | (2.5-3.7) | -0.9<br>0.05      | 3.5                   | (2.5-4.5) | 0.4<br>0.47       | 2.8                    | (2.0-3.7)  | -0.7<br>0.31      |
| <i>p-value</i> ‡               | 0.03                |            | 0.15                 |           |                   | 0.80                 |            |                   | 0.66                    |            |                   | 0.76                |            |                   | 0.52                       |           |                   | 0.006                 |           |                   | 0.02                   |            |                   |
| Household size                 |                     |            |                      |           |                   |                      |            |                   |                         |            |                   |                     |            |                   |                            |           |                   |                       |           |                   |                        |            |                   |
| 1-2                            | 6.7                 | (6.0-7.4)  | 2.6                  | (2.1-3.1) | -4.1<br><.001     | 3.8                  | (3.2-4.3)  | 1.2<br><.001      | 3.7                     | (3.0-4.5)  | -0.0<br>0.95      | 3.2                 | (2.8-3.7)  | -0.5<br>0.22      | 2.4                        | (2.1-2.7) | -0.8<br><.001     | 2.9                   | (2.5-3.4) | 0.5<br>0.03       | 2.4                    | (2.0-2.8)  | -0.6<br>0.06      |
| 3-4                            | 9.1                 | (7.7-10.5) | 3.7                  | (2.9-4.5) | -5.4<br><.001     | 4.7                  | (4.1-5.3)  | 1.0<br>0.05       | 6.1                     | (4.6-7.6)  | 1.4<br>0.09       | 4.9                 | (4.2-5.6)  | -1.2<br>0.16      | 3.6                        | (3.0-4.1) | -1.3<br>0.001     | 4.2                   | (3.4-5.0) | 0.6<br>0.14       | 6.0                    | (4.5-7.6)  | 1.8<br>0.04       |
| ≥ 5                            | 9.4                 | (6.8-11.9) | 4.4                  | (3.4-5.5) | -4.9<br><.001     | 7.8                  | (5.9-9.7)  | 3.4<br>0.002      | 9.2                     | (6.7-11.7) | 1.4<br>0.38       | 6.7                 | (5.5-7.9)  | -2.5<br>0.08      | 5.3                        | (4.3-6.3) | -1.4<br>0.07      | 4.9                   | (4.1-5.7) | -0.4<br>0.54      | 7.8                    | (4.6-11.0) | 2.9<br>0.08       |
| <i>p-value</i> ‡               | 0.004               |            | 0.003                |           |                   | <.001                |            |                   | <.001                   |            |                   | <.001               |            |                   | <.001                      |           |                   | <.001                 |           |                   | <.001                  |            |                   |
| Household composition          |                     |            |                      |           |                   |                      |            |                   |                         |            |                   |                     |            |                   |                            |           |                   |                       |           |                   |                        |            |                   |
| With 0-17-yr-olds              | 9.6                 | (8.0-11.1) | 4.1                  | (3.3-4.9) | -5.5<br><.001     | 5.5                  | (4.7-6.3)  | 1.4<br>0.005      | 7.4                     | (5.9-8.8)  | 1.9<br>0.02       | 6.1                 | (5.3-6.9)  | -1.3<br>0.11      | 3.9                        | (3.3-4.5) | -2.1<br><.001     | 4.3                   | (3.7-4.9) | 0.4<br>0.25       | 7.2                    | (5.6-8.7)  | 2.9<br><.001      |
| Without 0-17-yr-olds           | 6.8                 | (6.1-7.4)  | 2.6                  | (2.1-3.1) | -4.2<br><.001     | 3.8                  | (3.2-4.3)  | 1.2<br><.001      | 3.7                     | (2.9-4.4)  | -0.1<br>0.84      | 3.1                 | (2.7-3.5)  | -0.6<br>0.12      | 2.5                        | (2.1-2.8) | -0.6<br>0.002     | 3.1                   | (2.5-3.6) | 0.6<br>0.02       | 2.3                    | (1.9-2.8)  | -0.7<br>0.02      |
| <i>p-value</i> ‡               | 0.002               |            | 0.004                |           |                   | 0.001                |            |                   | <.001                   |            |                   | <.001               |            |                   | <.001                      |           |                   | 0.004                 |           |                   | <.001                  |            |                   |
| Race                           |                     |            |                      |           |                   |                      |            |                   |                         |            |                   |                     |            |                   |                            |           |                   |                       |           |                   |                        |            |                   |
| Caucasian                      | 7.8                 | (7.2-8.5)  | 3.3                  | (2.9-3.7) | -4.5<br><.001     | 4.6                  | (4.1-5.0)  | 1.3<br><.001      | 4.9                     | (4.2-5.7)  | 0.4<br>0.39       | 4.1                 | (3.7-4.4)  | -0.9<br>0.04      | 3.1                        | (2.9-3.4) | -0.9<br><.001     | 3.7                   | (3.3-4.1) | 0.5<br>0.02       | 3.7                    | (3.2-4.2)  | 0.0<br>0.91       |
| Other                          | 6.9                 | (4.9-8.8)  | 2.8                  | (1.6-4.1) | -4.1<br><.001     | 3.1                  | (2.2-4.0)  | 0.3<br>0.74       | 4.6                     | (2.7-6.6)  | 1.5<br>0.16       | 3.6                 | (2.6-4.6)  | -1.0<br>0.36      | 2.9                        | (2.0-3.8) | -0.7<br>0.34      | 2.7                   | (1.9-3.5) | -0.2<br>0.72      | 3.9                    | (0.7-7.2)  | 1.2<br>0.47       |
| <i>p-value</i> ‡               | 0.37                |            | 0.50                 |           |                   | 0.005                |            |                   | 0.77                    |            |                   | 0.38                |            |                   | 0.64                       |           |                   | 0.04                  |           |                   | 0.89                   |            |                   |



|                   | Pre-Covid<br>n=1291 |           | Spring 2020<br>n=546 |           |          | Summer 2020<br>n=988 |           |          | September 2020<br>n=431 |           |          | Fall 2020<br>n=1052 |           |          | Holidays 2020-21<br>n=1569 |           |          | January 2021<br>n=501 |           |          | February 2021<br>n=429 |           |          |
|-------------------|---------------------|-----------|----------------------|-----------|----------|----------------------|-----------|----------|-------------------------|-----------|----------|---------------------|-----------|----------|----------------------------|-----------|----------|-----------------------|-----------|----------|------------------------|-----------|----------|
|                   | mean                | 95% CI    | mean                 | 95% CI    | Diff†    | mean                 | 95% CI    | Diff†    | mean                    | 95% CI    | Diff†    | mean                | 95% CI    | Diff†    | mean                       | 95% CI    | Diff†    | mean                  | 95% CI    | Diff†    | mean                   | 95% CI    | Diff†    |
|                   |                     |           |                      |           | <i>p</i> |                      |           | <i>p</i> |                         |           | <i>p</i> |                     |           | <i>p</i> |                            |           | <i>p</i> |                       |           | <i>p</i> |                        |           | <i>p</i> |
| Country of origin |                     |           |                      |           |          |                      |           |          |                         |           |          |                     |           |          |                            |           |          |                       |           |          |                        |           |          |
| Canada            | 7.7                 | (7.1-8.4) | 3.2                  | (2.9-3.6) | -4.5     | 4.4                  | (4.0-4.8) | 1.2      | 4.9                     | (4.2-5.7) | 0.5      | 4.1                 | (3.7-4.4) | -0.9     | 3.1                        | (2.9-3.3) | -1.0     | 3.7                   | (3.3-4.1) | 0.6      | 3.6                    | (3.1-4.1) | -0.0     |
|                   |                     |           |                      |           | <.001    |                      |           | <.001    |                         |           | 0.19     |                     |           | 0.04     |                            |           | <.001    |                       |           | 0.006    |                        |           | 0.95     |
| Other             | 7.5                 | (5.5-9.4) | 2.6                  | (1.5-3.7) | -4.8     | 4.7                  | (2.3-7.1) | 2.1      | 4.3                     | (2.6-6.1) | -0.4     | 3.6                 | (2.9-4.4) | -0.7     | 3.5                        | (2.3-4.7) | -0.1     | 2.9                   | (2.3-3.6) | -0.6     | 3.7                    | (1.5-6.0) | 0.8      |
|                   |                     |           |                      |           | <.001    |                      |           | 0.12     |                         |           | 0.81     |                     |           | 0.48     |                            |           | 0.86     |                       |           | 0.39     |                        |           | 0.48     |
| <i>p-value</i> ‡  |                     | 0.79      |                      | 0.28      |          |                      | 0.81      |          |                         | 0.53      |          |                     | 0.28      |          |                            | 0.46      |          |                       | 0.06      |          |                        |           | 0.92     |
| Mother tongue     |                     |           |                      |           |          |                      |           |          |                         |           |          |                     |           |          |                            |           |          |                       |           |          |                        |           |          |
| French            | 7.9                 | (7.2-8.6) | 3.3                  | (2.9-3.7) | -4.6     | 4.5                  | (4.0-5.0) | 1.2      | 4.9                     | (4.1-5.6) | 0.4      | 4.1                 | (3.7-4.4) | -0.8     | 3.1                        | (2.9-3.3) | -1.0     | 3.7                   | (3.3-4.1) | 0.6      | 3.9                    | (3.3-4.5) | 0.2      |
|                   |                     |           |                      |           | <.001    |                      |           | <.001    |                         |           | 0.42     |                     |           | 0.07     |                            |           | <.001    |                       |           | 0.009    |                        |           | 0.59     |
| English           | 7.4                 | (5.7-9.0) | 2.2                  | (1.5-2.9) | -5.2     | 4.9                  | (3.7-6.0) | 2.7      | 4.8                     | (3.1-6.5) | -0.1     | 4.0                 | (3.0-5.1) | -0.7     | 2.6                        | (2.1-3.2) | -1.4     | 3.3                   | (2.3-4.4) | 0.7      | 2.4                    | (1.4-3.4) | -0.9     |
|                   |                     |           |                      |           | <.001    |                      |           | <.001    |                         |           | 0.90     |                     |           | 0.47     |                            |           | 0.02     |                       |           | 0.25     |                        |           | 0.19     |
| Other             | 5.2                 | (3.3-7.1) | 2.4                  | (1.4-3.5) | -2.8     | 2.5                  | (2.2-2.8) | 0.1      | 5.2                     | (2.5-7.8) | 2.6      | 3.6                 | (2.7-4.4) | -1.6     | 3.8                        | (2.0-5.6) | 0.2      | 2.6                   | (2.1-3.2) | -1.1     | 2.7                    | (1.3-4.1) | 0.1      |
|                   |                     |           |                      |           | 0.01     |                      |           | 0.88     |                         |           | 0.05     |                     |           | 0.26     |                            |           | 0.83     |                       |           | 0.23     |                        |           | 0.91     |
| <i>p-value</i> ‡  |                     | 0.03      |                      | 0.02      |          |                      | <.001     |          |                         | 0.97      |          |                     | 0.54      |          |                            | 0.25      |          |                       | 0.006     |          |                        |           | 0.03     |

**Pre-Covid:** February 1<sup>st</sup> 2018 to March 17<sup>th</sup> 2019; **Spring 2020:** April 21<sup>st</sup> to May 25<sup>th</sup> 2020; **Summer 2020:** July 3<sup>rd</sup> to August 31<sup>st</sup> 2020; **Fall 2020:** October 1<sup>st</sup> to December 16<sup>th</sup> 2020; **Holidays 2020-2021:** December 17<sup>th</sup> 2020 to January 8<sup>th</sup> 2021. **1<sup>st</sup> wave:** Spring 2020; **2<sup>nd</sup> wave:** September 2020 to February 2021.

Comparisons are adjusted for age, except for the total estimate, estimates stratified by age, and estimates stratified by Greater Montréal and Other regions (Greater Montréal and Other regions are weighted to represent their respective age distribution).

\* Among participants aged 25-64 years.

† Diff: Absolute difference with the preceding period and p-value of this difference

‡ p-value of difference between the categories of a given characteristic for each time point.

§ Greater Mtl: Regions of Montréal, Laval, Montérégie, Lanaudière, Laurentides.

**Table S4. Time trends in the number of social contacts\* at school/daycare among children-students according to school level.**

|                   | Pre-Covid School season<br>n=427 |           |  | Spring 2020<br>n=167 |           |               | Summer 2020<br>n=250 |           |              | September 2020<br>n=119 |            |              | Fall 2020<br>n=293 |           |              | Holidays 2020-21<br>n=442 |           |               | January 2021<br>n=145 |           |              | February 2021<br>n=112 |           |              |
|-------------------|----------------------------------|-----------|--|----------------------|-----------|---------------|----------------------|-----------|--------------|-------------------------|------------|--------------|--------------------|-----------|--------------|---------------------------|-----------|---------------|-----------------------|-----------|--------------|------------------------|-----------|--------------|
|                   | mean                             | 95% CI    |  | mean                 | 95% CI    | Diff†<br>p    | mean                 | 95% CI    | Diff†<br>p   | mean                    | 95% CI     | Diff†<br>p   | mean               | 95% CI    | Diff†<br>p   | mean                      | 95% CI    | Diff†<br>p    | mean                  | 95% CI    | Diff†<br>p   | mean                   | 95% CI    | Diff†<br>p   |
| All students      | 3.1                              | (2.5-3.6) |  | 0.0                  | (0.0-0.0) | -3.0<br><.001 | 0.6                  | (0.3-1.0) | 0.6<br><.001 | 2.9                     | (1.9-4.0)  | 2.3<br><.001 | 2.0                | (1.5-2.5) | -0.9<br>0.14 | 0.1                       | (0.0-0.2) | -1.9<br><.001 | 1.1                   | (0.6-1.5) | 1.0<br><.001 | 3.0                    | (1.8-4.2) | 1.9<br>0.004 |
| Daycare           | 3.6                              | (3.1-4.2) |  | 0.0                  | (0.0-0.1) | -3.6<br><.001 | 1.9                  | (0.7-3.1) | 1.9<br>0.002 | 2.8                     | (0.7-4.8)  | 0.8<br>0.49  | 4.2                | (2.9-5.5) | 1.4<br>0.24  | 0.3                       | (0.1-0.6) | -3.9<br><.001 | 3.3                   | (1.8-4.8) | 3.0<br><.001 | 2.4                    | (0.9-4.0) | -0.8<br>0.46 |
| Elementary school | 3.8                              | (2.9-4.7) |  | 0.0                  | NA        | -3.8<br>NA    | 0.2                  | (0.0-0.5) | 0.2<br>NA    | 6.3                     | (2.5-10.1) | 6.0<br>0.002 | 5.2                | (3.2-7.2) | -1.1<br>0.63 | 0.0                       | (0.0-0.0) | -5.2<br><.001 | 1.5                   | (0.4-2.7) | 1.5<br>0.008 | 5.9                    | (2.7-9.1) | 4.3<br>0.01  |
| High school       | 4.2                              | (2.8-5.7) |  | 0.0                  | NA        | -4.2<br>NA    | 0.0                  | (0.0-0.1) | 0.0<br>NA    | 4.2                     | (2.3-6.0)  | 4.1<br><.001 | 1.8                | (1.2-2.4) | -2.4<br>0.02 | 0.0                       | (0.0-0.0) | -1.8<br><.001 | 0.5                   | (0.1-0.8) | 0.5<br>0.007 | 3.2                    | (1.5-5.0) | 2.7<br>0.003 |
| Post-secondary    | 1.2                              | (0.6-1.7) |  | 0.0                  | NA        | -1.2<br>NA    | 0.4                  | (0.0-1.1) | 0.4<br>NA    | 0.1                     | (0.0-0.2)  | -0.3<br>0.30 | 0.1                | (0.0-0.2) | 0.0<br>0.80  | 0.1                       | (0.0-0.2) | -0.0<br>0.94  | 0.0                   | (0.0-0.1) | -0.0<br>0.67 | 0.1                    | (0.0-0.2) | 0.0<br>0.64  |

**Pre-Covid school season:** February 1<sup>st</sup> 2018 to March 17<sup>th</sup> 2019, excluding July and August 2018; **Spring 2020:** April 21<sup>st</sup> to May 25<sup>th</sup> 2020; **Summer 2020:** July 3<sup>rd</sup> to August 31<sup>st</sup> 2020; **Fall 2020:** October 1<sup>st</sup> to December 16<sup>th</sup> 2020; **Holidays 2020-2021:** December 17<sup>th</sup> 2020 to January 8<sup>th</sup> 2021. **1<sup>st</sup> wave:** Spring 2020; **2<sup>nd</sup> wave:** September 2020 to February 2021.

NA: Not available because there was 0 contact during Spring 2020 (all schools closed).

\* Mean number of social contacts at school weighted to represent the mean daily contact over one usual week, estimated among students only.

† Diff: Absolute difference with the preceding period and p-value of this difference.

The mean numbers of contacts in this table are not exactly the same as those for school in Figure 2A because 1) the pre-Covid estimates are restricted to the school season, 2) the estimates include all students, irrespective of their age, 3) the mean is estimated among students only whereas in Figure 2A the mean is estimated among all 0-17-year-olds, some of whom do not attend school.

**Table S5. Time trends in social contacts at work\*, among workers and according to the type of employment (2016 National occupation classification).**

|                                                        | Pre-Covid<br>n=355 |            |  | Spring 2020<br>n=272 |            |                        | Summer 2020<br>n=515 |            |                        | September 2020<br>n=231 |            |                        | Fall 2020<br>n=531 |            |                        | Holidays 2020-21<br>n=778 |            |                        | January 2021<br>n=251 |            |                        | February 2021<br>n=214 |           |                        |
|--------------------------------------------------------|--------------------|------------|--|----------------------|------------|------------------------|----------------------|------------|------------------------|-------------------------|------------|------------------------|--------------------|------------|------------------------|---------------------------|------------|------------------------|-----------------------|------------|------------------------|------------------------|-----------|------------------------|
|                                                        | mean               | 95% CI     |  | mean                 | 95% CI     | Diff <sup>†</sup><br>p | mean                 | 95% CI     | Diff <sup>†</sup><br>p | mean                    | 95% CI     | Diff <sup>†</sup><br>p | mean               | 95% CI     | Diff <sup>†</sup><br>p | mean                      | 95% CI     | Diff <sup>†</sup><br>p | mean                  | 95% CI     | Diff <sup>†</sup><br>p | mean                   | 95% CI    | Diff <sup>†</sup><br>p |
| All workers                                            | 7.3                | (6.1-8.6)  |  | 2.6                  | (1.7-3.4)  | -4.8<br><.001          | 2.5                  | (1.7-3.2)  | -0.1<br>0.85           | 3.0                     | (1.8-4.1)  | 0.5<br>0.46            | 2.4                | (1.9-3.0)  | -0.5<br>0.42           | 1.8                       | (1.3-2.3)  | -0.6<br>0.09           | 2.1                   | (1.5-2.8)  | 0.3<br>0.43            | 1.9                    | (1.0-2.9) | -0.2<br>0.74           |
| 0. Management                                          | 10.2               | (5.7-14.8) |  | 3.2                  | (0.0-6.4)  | -7.0<br>0.01           | 4.7                  | (1.1-8.3)  | 1.5<br>0.54            | 1.1                     | (0.0-2.7)  | -3.6<br>0.07           | 2.0                | (0.7-3.2)  | 0.8<br>0.41            | 1.8                       | (0.3-3.2)  | -0.2<br>0.83           | 2.3                   | (0.3-4.2)  | 0.5<br>0.68            | 3.7                    | (0.2-7.2) | 1.4<br>0.49            |
| 1. Business, finance & administration                  | 6.5                | (4.3-8.7)  |  | 0.5                  | (0.1-0.9)  | -6.0<br><.001          | 0.7                  | (0.2-1.1)  | 0.2<br>0.46            | 2.9                     | (0.6-5.2)  | 2.2<br>0.07            | 0.6                | (0.3-0.9)  | -2.2<br>0.06           | 0.4                       | (0.1-0.6)  | -0.2<br>0.26           | 0.6                   | (0.0-1.4)  | 0.3<br>0.50            | 1.2                    | (0.0-2.8) | 0.5<br>0.57            |
| 2. Natural & applied sciences                          | 3.4                | (1.9-5.0)  |  | 0.2                  | (0.0-0.4)  | -3.3<br><.001          | 0.4                  | (0.1-0.7)  | 0.3<br>0.15            | 0.5                     | (0.0-1.0)  | 0.1<br>0.85            | 0.7                | (0.2-1.2)  | 0.2<br>0.57            | 0.4                       | (0.1-0.8)  | -0.3<br>0.44           | 1.1                   | (0.0-2.6)  | 0.6<br>0.43            | 0.4                    | (0.1-0.8) | -0.6<br>0.43           |
| 3. Health                                              | 10.1               | (6.8-13.5) |  | 6.7                  | (2.6-10.8) | -3.4<br>0.20           | 4.2                  | (2.2-6.2)  | -2.5<br>0.27           | 5.0                     | (0.0-11.2) | 0.8<br>0.81            | 7.9                | (4.8-10.9) | 2.9<br>0.42            | 7.3                       | (4.4-10.2) | -0.5<br>0.80           | 7.3                   | (3.6-11.1) | 0.0<br>0.99            | 2.9                    | (0.0-6.1) | -4.5<br>0.07           |
| 4. Education, law & social, community & gov. services  | 4.0                | (1.9-6.0)  |  | 1.6                  | (0.0-4.1)  | -2.4<br>0.15           | 0.5                  | (0.2-0.9)  | -1.0<br>0.43           | 1.2                     | (0.0-3.2)  | 0.7<br>0.50            | 1.0                | (0.4-1.6)  | -0.2<br>0.85           | 0.9                       | (0.0-1.8)  | -0.2<br>0.79           | 0.1                   | (0.0-0.3)  | -0.7<br>0.15           | 0.7                    | (0.0-1.5) | 0.6<br>0.13            |
| 5. Art, culture, recreation & sport                    | 0.7                | (0.1-1.3)  |  | 0.1                  | (0.0-0.3)  | -0.6<br>0.09           | 2.2                  | (0.2-4.2)  | 2.1<br>0.05            | 1.8                     | (0.0-4.6)  | -0.3<br>0.84           | 0.4                | (0.0-0.9)  | -1.4<br>0.32           | 0.4                       | (0.0-1.0)  | -0.1<br>0.90           | NA                    |            |                        | NA                     |           |                        |
| 6. Sales & services                                    | 10.8               | (7.9-13.7) |  | 4.7                  | (1.7-7.7)  | -6.1<br>0.005          | 7.4                  | (3.9-11.0) | 2.7<br>0.25            | 8.4                     | (3.5-13.4) | 1.0<br>0.75            | 4.9                | (2.5-7.3)  | -3.5<br>0.21           | 3.9                       | (2.0-5.8)  | -1.1<br>0.49           | 3.2                   | (1.2-5.2)  | -0.7<br>0.61           | 5.6                    | (1.3-9.8) | 2.4<br>0.32            |
| 7. Trades, transport & equipment operators             | 3.4                | (1.4-5.3)  |  | 3.3                  | (0.5-6.0)  | -0.1<br>0.95           | 1.6                  | (0.5-2.7)  | -1.7<br>0.26           | 1.5                     | (0.1-2.9)  | -0.1<br>0.93           | 3.1                | (0.9-5.4)  | 1.6<br>0.22            | 0.9                       | (0.3-1.5)  | -2.2<br>0.06           | 1.0                   | (0.1-1.9)  | 0.1<br>0.85            | 1.1                    | (0.0-2.6) | 0.1<br>0.92            |
| 8. Natural resources, agriculture & related production | 6.0                | (0.0-16.5) |  | 4.3                  | (0.0-12.1) | -1.7<br>0.79           | 1.1                  | (0.1-2.1)  | -3.2<br>0.43           | 1.0                     | (1.0-1.0)  | -0.1<br>0.87           | 0.9                | (0.0-2.1)  | -0.1<br>0.93           | 1.3                       | (0.4-2.2)  | 0.4<br>0.64            | 1.5                   | (0.0-3.7)  | 0.2<br>0.86            | NA                     |           |                        |
| 9. Manufacturing & utilities                           | 16.9               | (3.9-29.9) |  | 1.8                  | (0.2-3.4)  | -15.1<br>0.02          | 0.5                  | (0.0-1.1)  | -1.3<br>0.14           | 6.0                     | (0.0-16.6) | 5.5<br>0.31            | 8.5                | (2.0-15.0) | 2.6<br>0.66            | 1.3                       | (0.2-2.4)  | -7.2<br>0.03           | 4.4                   | (0.5-8.2)  | 3.1<br>0.13            | 0.9                    | (0.0-1.8) | -3.5<br>0.08           |

**Pre-Covid:** February 1<sup>st</sup> 2018 to March 17<sup>th</sup> 2019; **Spring 2020:** April 21<sup>st</sup> to May 25<sup>th</sup> 2020; **Summer 2020:** July 3<sup>rd</sup> to August 31<sup>st</sup> 2020; **Fall 2020:** October 1<sup>st</sup> to December 16<sup>th</sup> 2020;

**Holidays 2020-2021:** December 17<sup>th</sup> 2020 to January 8<sup>th</sup> 2021. **1<sup>st</sup> wave:** Spring 2020; **2<sup>nd</sup> wave:** September 2020 to February 2021.

\* Mean number of social contacts at work weighted to represent the mean daily contact over one usual week, estimated among workers.

† Diff: Absolute difference with the preceding period and p-value of this difference.

NA: Not available because there was no participant in these types of employment for these specific periods.

**Table S6. Time trends in the proportion of workers who reported working remotely, according to the type of employment (2016 National occupation classification).**

|                                                       | Spring 2020<br>n=179 |             |  | Summer 2020<br>n=364 |             |                | September 2020<br>n=180 |             |               | Fall 2020<br>n=406 |             |               | Holidays 2020-21<br>n=395 |             |              | January 2021<br>n=182 |               |               | February 2021<br>n=179 |              |               |
|-------------------------------------------------------|----------------------|-------------|--|----------------------|-------------|----------------|-------------------------|-------------|---------------|--------------------|-------------|---------------|---------------------------|-------------|--------------|-----------------------|---------------|---------------|------------------------|--------------|---------------|
|                                                       | %                    | 95% CI      |  | %                    | 95% CI      | Diff†<br>p     | %                       | 95% CI      | Diff†<br>p    | %                  | 95% CI      | Diff†<br>p    | %                         | 95% CI      | Diff†<br>p   | %                     | 95% CI        | Diff†<br>p    | %                      | 95% CI       | Diff†<br>p    |
| All workers*                                          | 54.9                 | (47.1-62.7) |  | 41.7                 | (36.0-47.3) | -13.2<br>0.007 | 44.2                    | (36.4-52.0) | 2.6<br>0.60   | 49.0               | (44.0-54.1) | 4.8<br>0.31   | 44.1                      | (38.8-49.3) | -5.0<br>0.18 | 41.7                  | (34.2-49.3)   | -2.3<br>0.62  | 57.0                   | (49.4-64.6)  | 15.3<br>0.005 |
| 0. Management                                         | 73.9                 | (55.7-92.0) |  | 43.1                 | (29.2-57.1) | -30.7<br>0.009 | 55.3                    | (35.0-75.6) | 12.1<br>0.33  | 63.2               | (49.9-76.6) | 8.0<br>0.52   | 54.9                      | (40.1-69.7) | -8.4<br>0.41 | 30.8                  | (12.2-49.4)   | -24.1<br>0.05 | 64.1                   | (46.6-81.6)  | 33.4<br>0.01  |
| 1. Business, finance & administration                 | 70.9                 | (54.8-87.0) |  | 60.7                 | (48.1-73.3) | -10.1<br>0.33  | 63.5                    | (47.6-79.5) | 2.8<br>0.79   | 57.1               | (47.1-67.0) | -6.5<br>0.50  | 64.6                      | (53.4-75.8) | 7.5<br>0.32  | 77.9                  | (62.9-92.9)   | 13.3<br>0.16  | 68.9                   | (52.5-85.3)  | -8.9<br>0.43  |
| 2. Natural & applied sciences                         | 88.3                 | (77.1-99.5) |  | 70.6                 | (56.7-84.5) | -17.8<br>0.05  | 56.7                    | (37.1-76.2) | -13.9<br>0.26 | 68.6               | (56.6-80.5) | 11.9<br>0.31  | 66.7                      | (54.4-79.1) | -1.8<br>0.84 | 69.4                  | (50.7-88.2)   | 2.7<br>0.82   | 77.4                   | (64.6-90.1)  | 8.0<br>0.49   |
| 3. Health                                             | 16.5                 | (0.0-33.6)  |  | 5.0                  | (0.0-10.8)  | -11.5<br>0.21  | 30.1                    | (0.0-67.4)  | 25.1<br>0.19  | 14.8               | (2.4-27.2)  | -15.2<br>0.45 | 9.0                       | (0.0-18.8)  | -5.8<br>0.47 | 5.4                   | (0.0-15.8)    | -3.6<br>0.63  | 16.4                   | (0.0-46.0)   | 10.9<br>0.49  |
| 4. Education, law & social, community & gov. services | 69.3                 | (44.1-94.5) |  | 52.0                 | (33.8-70.2) | -17.3<br>0.28  | 48.6                    | (25.7-71.4) | -3.4<br>0.82  | 53.1               | (38.2-68.0) | 4.5<br>0.75   | 72.3                      | (56.5-88.1) | 19.2<br>0.08 | 68.2                  | (47.0-89.5)   | -4.1<br>0.76  | 61.8                   | (35.2-88.4)  | -6.4<br>0.71  |
| 5. Art, culture, recreation & sport                   | 54.9                 | (20.6-89.3) |  | 68.9                 | (50.8-87.0) | 14.0<br>0.48   | 49.1                    | (12.7-85.5) | -19.8<br>0.34 | 78.0               | (60.2-95.8) | 28.9<br>0.16  | 69.4                      | (43.5-95.3) | -8.6<br>0.59 | 100.0                 | (100.0-100.0) | 30.6<br>0.02  | 89.0                   | (67.6-110.4) | -11.0<br>0.32 |
| 6. Sales & services                                   | 33.5                 | (9.6-57.4)  |  | 21.7                 | (9.9-33.5)  | -11.8<br>0.39  | 15.8                    | (2.2-29.5)  | -5.8<br>0.53  | 27.7               | (14.6-40.8) | 11.8<br>0.22  | 20.8                      | (9.8-31.8)  | -6.9<br>0.43 | 19.2                  | (4.7-33.7)    | -1.6<br>0.86  | 31.0                   | (11.4-50.6)  | 11.8<br>0.34  |

**Pre-Covid:** February 1<sup>st</sup> 2018 to March 17<sup>th</sup> 2019; **Spring 2020:** April 21<sup>st</sup> to May 25<sup>th</sup> 2020; **Summer 2020:** July 3<sup>rd</sup> to August 31<sup>st</sup> 2020; **Fall 2020:** October 1<sup>st</sup> to December 16<sup>th</sup> 2020; **Holidays 2020-2021:** December 17<sup>th</sup> 2020 to January 8<sup>th</sup> 2021. **1<sup>st</sup> wave:** Spring 2020; **2<sup>nd</sup> wave:** September 2020 to February 2021.

\* Very few workers in the domains of trades, transport & equipment operators (#7), Natural resources agriculture & related production (#8), and Manufacturing & utilities (#9) reported working remotely.

† Diff: Absolute difference with the preceding period and p-value of this difference.
